# Supplementary material
Source: Springer Nature journal article supplement (https://www.springermedizin.de/resource/supplementary/13069_2008_5_MOESM10_ESM.pdf/9659588)
Supplement: MOESM10 [file 9659588]

| Organisms                       | Redox sensor    | Function                                            | Redox sensitive structure        | ROS/oxidant/other sensed                     |
|---------------------------------|-----------------|-----------------------------------------------------|----------------------------------|----------------------------------------------|
| <b><u>Prokariotic cells</u></b> | <b>Oxy - R</b>  | transcription factor                                | active cys, iron centres         | peroxides                                    |
|                                 | <b>Sox - R</b>  | transcription factor                                | active cys, iron centres         | superoxide                                   |
|                                 | <b>FNR</b>      | oxygen sensor                                       | [Fe-S] cluster                   | O <sub>2</sub> , iron                        |
|                                 | <b>Hsp33</b>    | chaperone                                           | cys-regulated coordination of Zn | H <sub>2</sub> O <sub>2</sub> , hypochlorite |
|                                 | <b>RsrA</b>     | anti-sigma R transcription factor                   | cys-regulated coordination of Zn | diamide                                      |
| <b><u>Yeast</u></b>             | <b>Orp-1</b>    | GPX like enzyme acting on TF Yap1                   | Cys - 36                         | H <sub>2</sub> O <sub>2</sub>                |
|                                 | <b>PRX-Tpx1</b> | PRX like enzyme acting on TF Pap1<br>chaperone Sty1 | Cys - 35                         | H <sub>2</sub> O <sub>2</sub>                |
